# Supplementary material for: A Broadband View of the Sea Surface Height Wavenumber Spectrum
Source: PubMed Central journal article supplement — Geophys Res Lett. 2022 Feb 16;49(4):e2021GL096699. doi: 10.1029/2021GL096699 (PMC9285931; doi:10.1029/2021gl096699), 2022-02-16
Supplement: GRL-49-0-s001.pdf [file GRL-49-0-s001.pdf]

# Supporting Information for “A Broadband View of the Sea Surface Height Wavenumber Spectrum”

Ana B. Villas Bôas<sup>1,2,3</sup>, Luc Lenain<sup>3</sup>, Bruce D. Cornuelle<sup>3</sup>, Sarah T. Gille<sup>3</sup>,

and Matthew R. Mazloff<sup>3</sup>

<sup>1</sup>California Institute of Technology

<sup>2</sup>Colorado School of Mines

<sup>3</sup>Scripps Institution of Oceanography

## Contents of this file

1. Figure S1
2. Figure S2

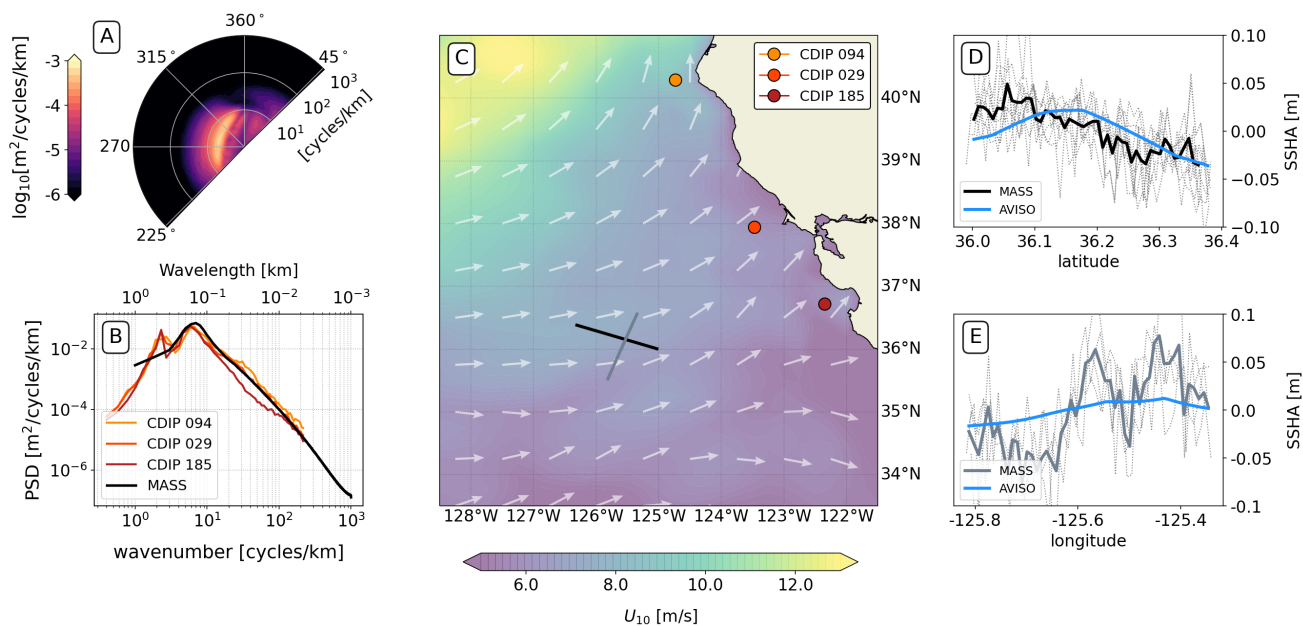

**Figure S1.** Same as Figure 2 in the main text, but for the March 28, 2019 flights.

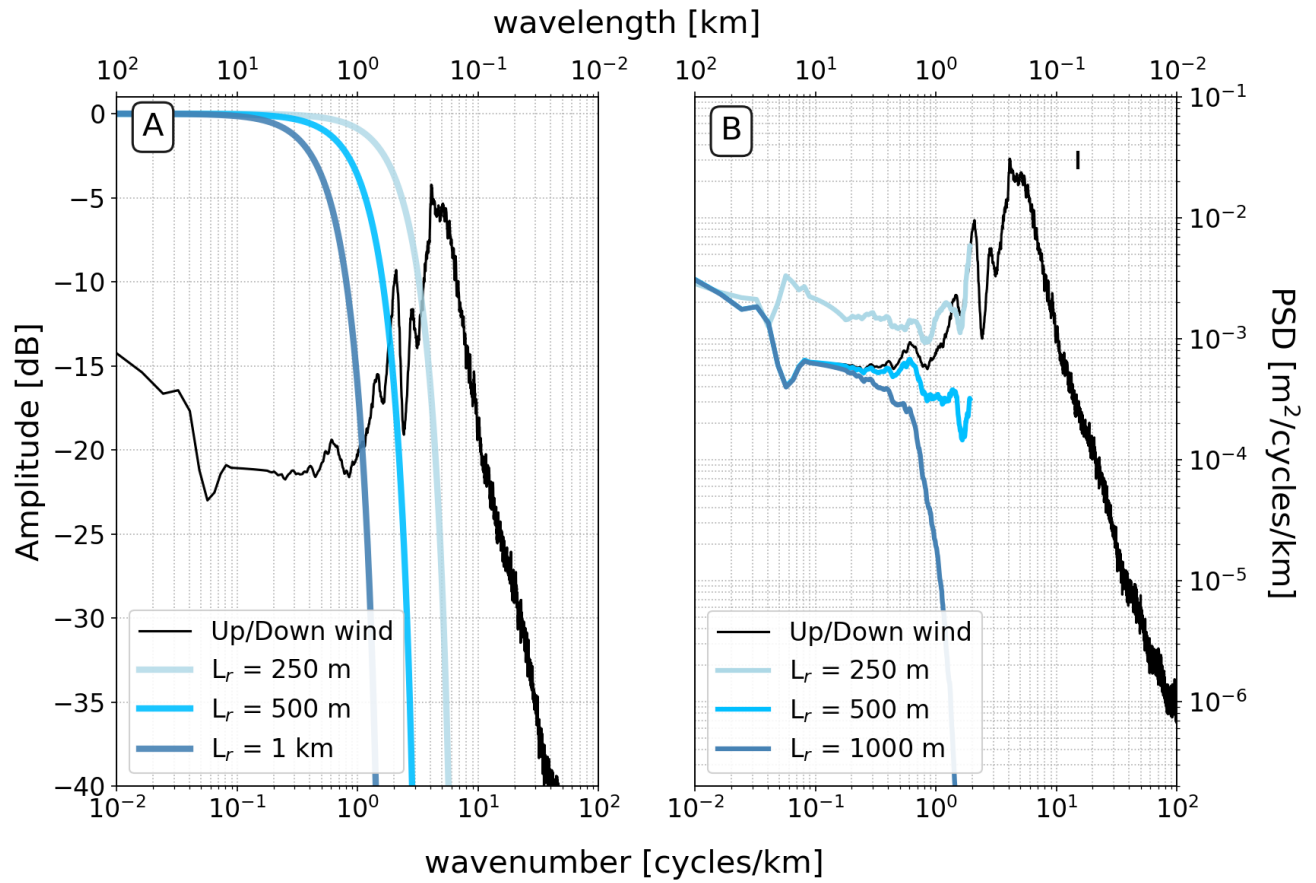

**Figure S2.** Same as Figure 4 in the main text, but for the March 28, 2019 flights.
